# Supplementary material for: Circulating and Tumor-Infiltrating NK Cells From Clear Cell Renal Cell Carcinoma Patients Exhibit a Predominantly Inhibitory Phenotype Characterized by Overexpression of CD85j, CD45, CD48 and PD-1
Source: PubMed Central journal article supplement (PMC8212993; doi:10.3389/fimmu.2021.681615), 2021-06-04
Supplement: DataSheet_2.pdf [file DataSheet_2.pdf]

**Supplementary Figure 2.**

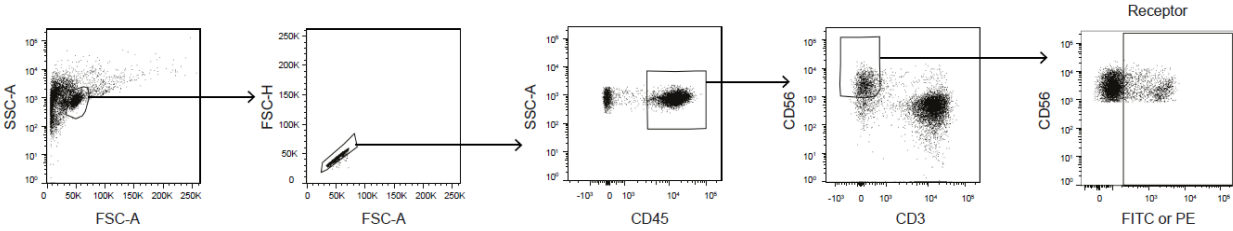

**Supplementary Figure 2. Strategy used to gate TINK from ccRCC patients, and to assess the expression of cell surface receptors. NK cells were defined as CD3<sup>-</sup>CD56<sup>+</sup> cells in the CD45<sup>+</sup> cell population.**
